# Supplementary material for: Functionalized metal–organic framework as a new platform for efficient and selective removal of cadmium(ii) from aqueous solution
Source: Royal Society of Chemistry journal article supplement (doi:10.1039/c5ta03201f), 2015-01-01
Supplement: c5ta03201f1.pdf [file c5ta03201f1.pdf]

## Electronic Supplementary Information

### **Functionalized Metal-Organic Framework as a New Platform for Efficient and Selective Removal of Cadmium (II) from aqueous solution**

**Yang Wang,<sup>\*a,b</sup> Guiqin Ye,<sup>a</sup> Huanhuan Chen,<sup>a</sup> Xiaoya Hu,<sup>a</sup> Zheng Niu<sup>b</sup> and Shengqian Ma<sup>\*b</sup>**

*<sup>a</sup> School of Chemistry and Chemical Engineering, Yangzhou University, Yangzhou 225002, China.*

*E-mail: wangyzu@126.com*

*<sup>b</sup> Department of Chemistry, University of South Florida, 4202 East Fowler Avenue, Tampa, Florida 33620, United State. sqma@usf.edu*

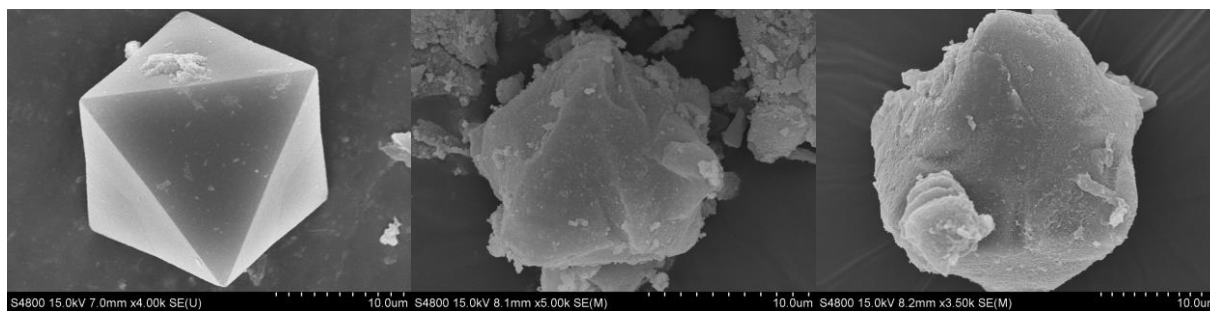

**Fig. S1.** SEM images for  $\text{Cu}_3(\text{BTC})_2$  (left),  $\text{Cu}_3(\text{BTC})_2\text{-SO}_3\text{H}$  (middle), and  $\text{Cu}_3(\text{BTC})_2\text{-SO}_3\text{H}$  (right) treated with cadmium solution.

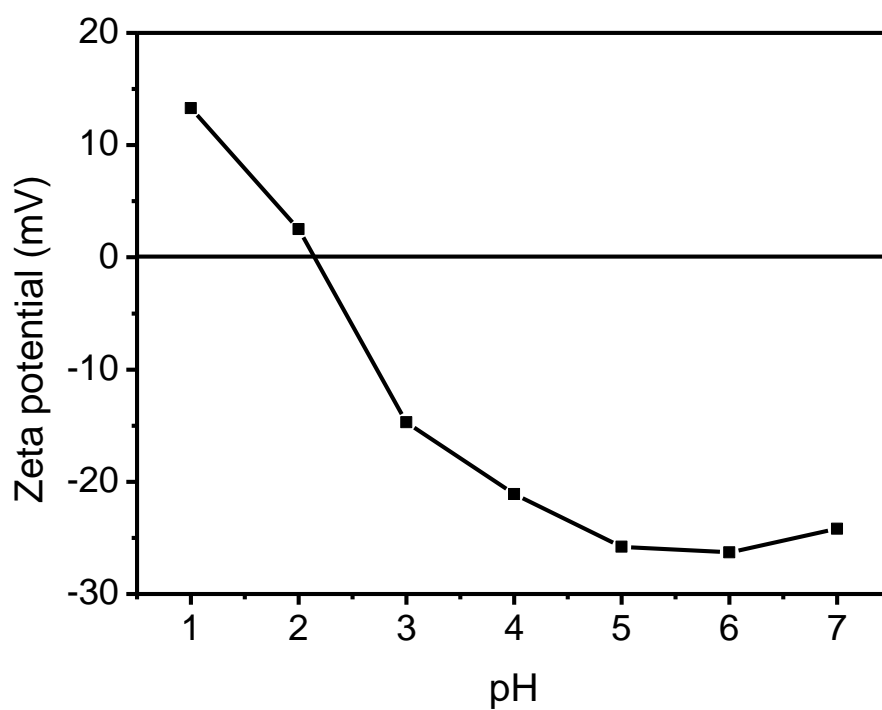

**Fig. S2.** Zeta potential curves vs. pH of the  $\text{Cu}_3(\text{BTC})_2\text{-SO}_3\text{H}$ .

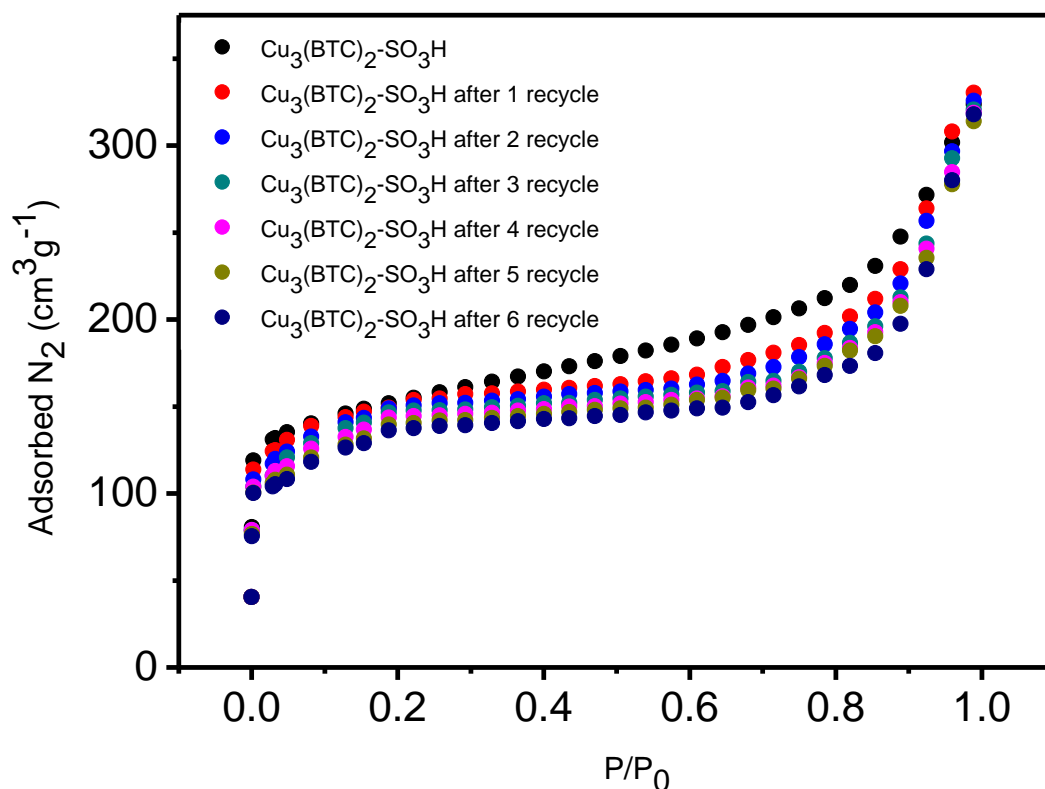

**Fig. S3.** N<sub>2</sub> adsorption isotherms for Cu<sub>3</sub>(BTC)<sub>2</sub>-SO<sub>3</sub>H and Cu<sub>3</sub>(BTC)<sub>2</sub>-SO<sub>3</sub>H treated with cadmium solution after, 1, 2, 3, 4, 5, and 6 cycles.

**Table S1.** The Langmuir and Freundlich isotherm constants of cadmium by Cu<sub>3</sub>(BTC)<sub>2</sub>-SO<sub>3</sub>H

| Metal ion | Langmuir constants |              |        | Freundlich constants |        |        |
|-----------|--------------------|--------------|--------|----------------------|--------|--------|
|           | $q_m$ (mg/g)       | $K_L$ (L/mg) | $R^2$  | $K_F$ (L/g)          | $1/n$  | $R^2$  |
| Cadmium   | 88.73              | 0.0305       | 0.9981 | 10.7884              | 0.3836 | 0.9725 |

**Table S2.** Kinetic parameters for the adsorption of cadmium by Cu<sub>3</sub>(BTC)<sub>2</sub>-SO<sub>3</sub>H

| Metal   | Experimental | Pseudo-first-order kinetic model |               |       | Pseudo-second-order kinetic model |                    |       |
|---------|--------------|----------------------------------|---------------|-------|-----------------------------------|--------------------|-------|
| Cadmium | $q_e$ (mg/g) | $q_e$ (mg/g)                     | $k_1$ (1/min) | $R^2$ | $q_e$ (mg/g)                      | $K_2$ ((g/mg)/min) | $R^2$ |

|        |        |        |        |       |        |        |
|--------|--------|--------|--------|-------|--------|--------|
| 0.9873 | 0.6506 | 0.2218 | 0.9885 | 1.066 | 0.6818 | 0.9994 |
|--------|--------|--------|--------|-------|--------|--------|

---
